# Supplementary material for: Facile construction of densely functionalized thiopyrano[2,3-b]quinolines via three-component reactions catalyzed by l-proline
Source: Royal Society of Chemistry journal article supplement (doi:10.1039/c4ra05042h), 2014-01-01
Supplement: c4ra05042h1.pdf [file c4ra05042h1.pdf]

# **Facile construction of densely functionalized thiopyrano[2,3-*b*]quinolines *via* three-component reactions catalyzed by L-proline**

**Mehul B. Kanani and Manish P. Patel\***

*Department of Chemistry, Sardar Patel University, Vallabh vidyanagar 388120, India*

## **Supporting information**

- 1.  $^1\text{H}$  NMR of Compounds**
- 2. Mass spectra**

# <sup>1</sup>H NMR of Compound 4a

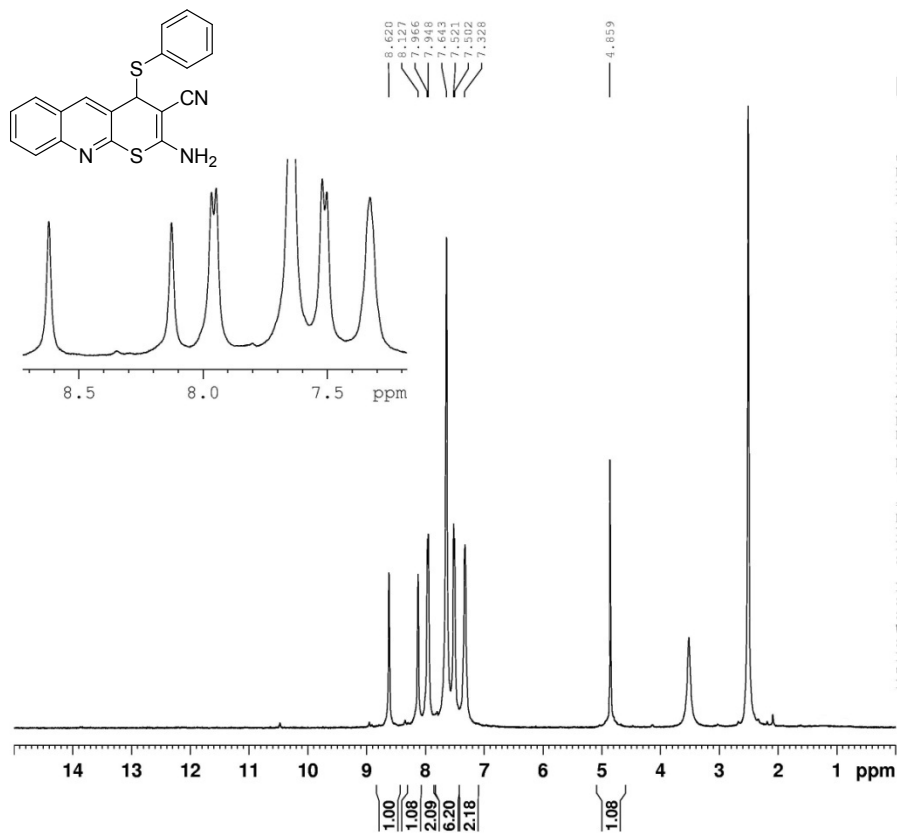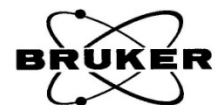

Current Data Parameters  
NAME MPP  
EXPNO 736  
PROCNO 1

F2 - Acquisition Parameters  
Date\_ 20130716  
Time 14.07  
INSTRUM spect  
PROBHD 5 mm BBO BB-1H  
PULPROG zg30  
TD 65536  
SOLVENT DMSO  
NS 16  
DS 2  
SWH 8278.146 Hz  
FIDRES 0.126314 Hz  
AQ 3.9584243 sec  
RG 362  
DW 60.400 usec  
DE 6.00 usec  
TE 298.3 K  
D1 1.00000000 sec  
TD0 1

===== CHANNEL f1 =====  
NUC1 1H  
P1 15.00 usec  
PL1 -6.00 dB  
SFO1 400.1324710 MHz

F2 - Processing parameters  
SI 32768  
SF 400.1300000 MHz  
WDW EM  
SSB 0  
LB 0.30 Hz  
GB 0  
PC 1.00

## Mass spectra of 4a

LC-MS Analysis Report  
DST-PURSE Central Facility  
Sardar Patel University  
Vallabh Vidyanagar

21-01-2014 10:28:49 Page 1 / 1

### <Sample Information>

Sample Name : TM 3b  
Sample ID : TM 3b  
Vial # : 1-19  
Injection Volume : 0.5 uL  
Date Acquired : 20-01-2014 11:48:58  
Date Processed : 20-01-2014 12:03:49

Sample Type : Unknown  
Acquired by : System Administrator  
Processed by : System Administrator

### <LC>

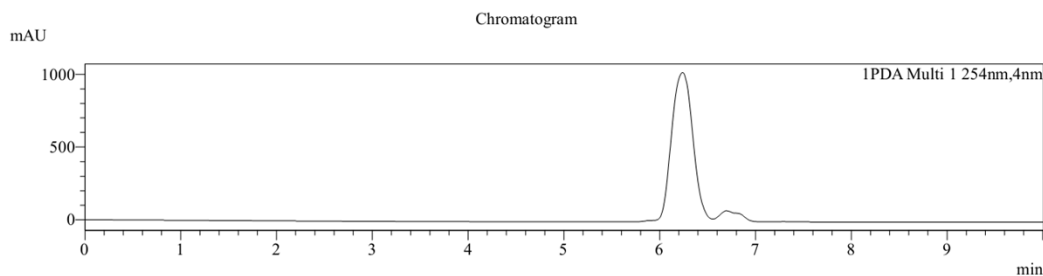

### <MS>

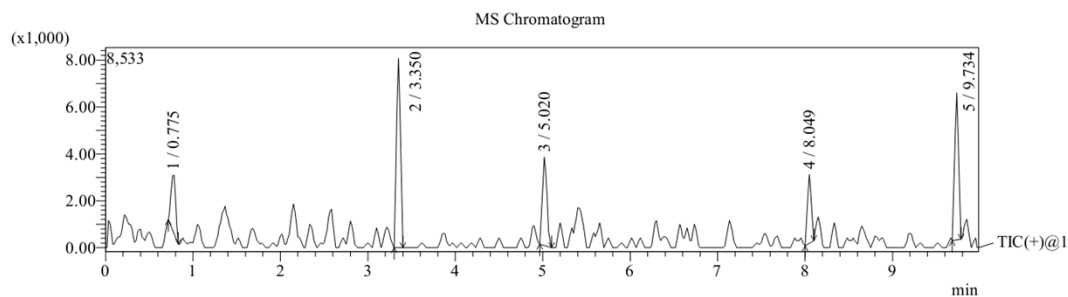

Line#:1 R.Time:----(Scan#;----)  
MassPeaks:3  
Spectrum Mode:Averaged 2.667-2.967(161-179) Base Peak:349(208)  
BG Mode:None Segment 1 - Event 1  
Precursor Ion Scan:m/z 348.00

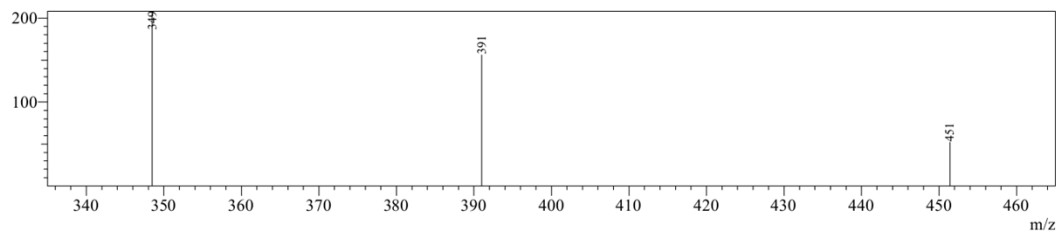

Line#:1 R.Time:----(Scan#;----)  
MassPeaks:3  
Spectrum Mode:Averaged 2.667-2.967(161-179) Base Peak:349(208)  
BG Mode:None Segment 1 - Event 1  
Precursor Ion Scan:m/z 348.00

| Sr. No. | m/z    | Absolute Intensity | Relative Intensity |
|---------|--------|--------------------|--------------------|
| 1       | 348.50 | 208                | 100.00             |
| 2       | 391.00 | 156                | 75.00              |
| 3       | 451.40 | 52                 | 25.00              |

# <sup>1</sup>H NMR of Compound 4b

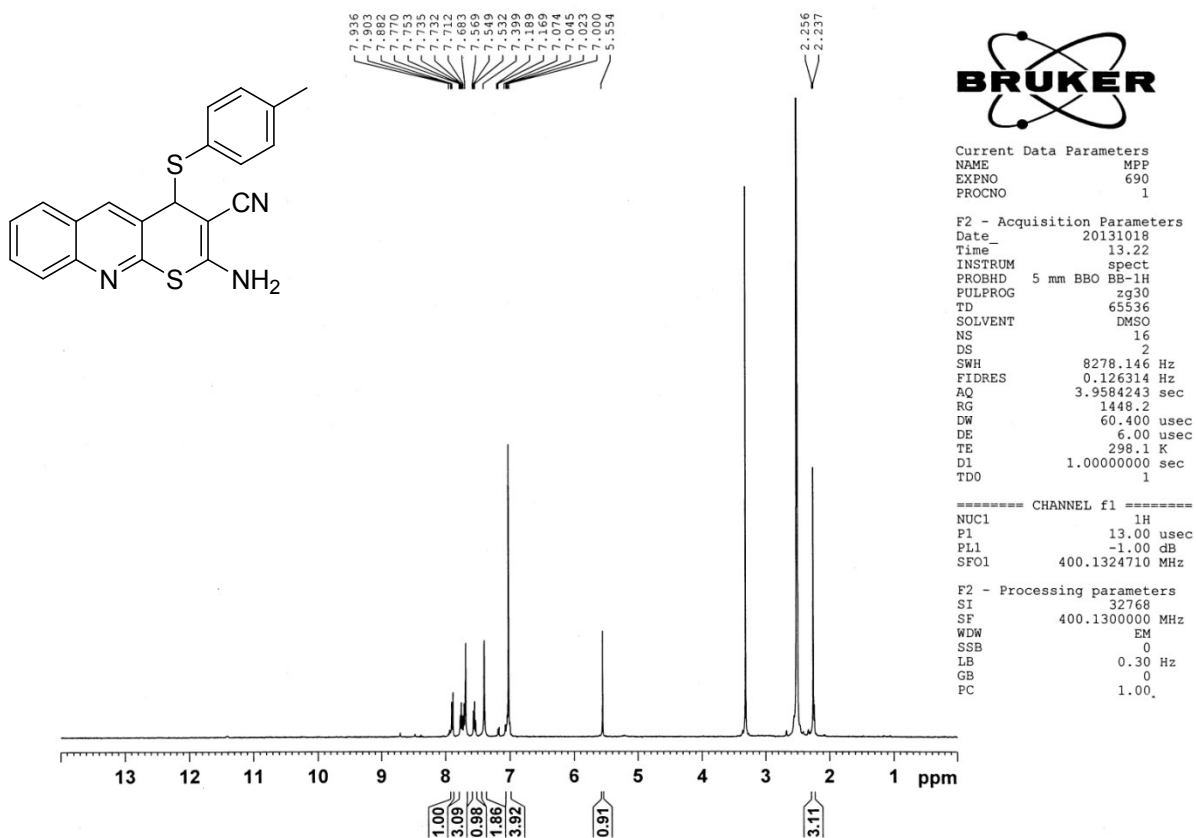

## Mass spectra of 4b

LC-MS Analysis Report  
DST-PURSE Central Facility  
Sardar Patel University  
Vallabh Vidyanagar

21-01-2014 10:32:02 Page 1 / 1

### <Sample Information>

|                  |                       |              |                        |
|------------------|-----------------------|--------------|------------------------|
| Sample Name      | : TM 6b               | Sample Type  | : Unknown              |
| Sample ID        | : TM 6b               |              |                        |
| Vial #           | : 1-21                |              |                        |
| Injection Volume | : 0.5 uL              |              |                        |
| Date Acquired    | : 20-01-2014 12:41:40 | Acquired by  | : System Administrator |
| Date Processed   | : 20-01-2014 12:57:22 | Processed by | : System Administrator |

### <LC>

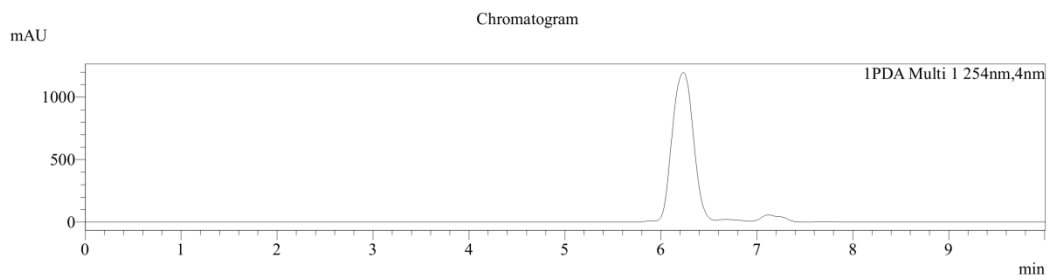

### <MS>

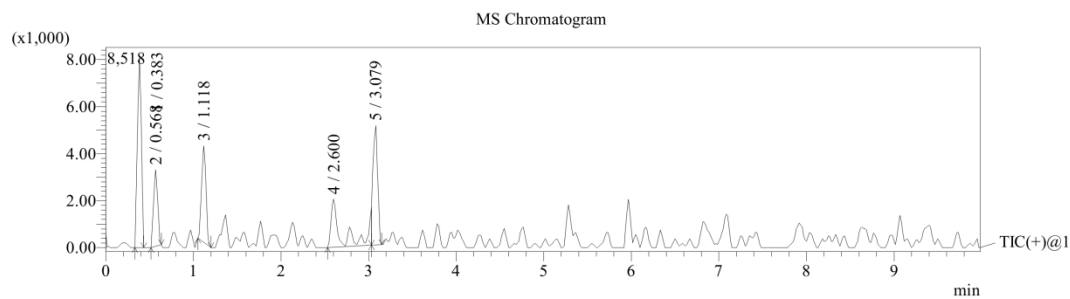

Line#:1 R.Time:----(Scan#:----)  
MassPeaks:5  
Spectrum Mode:Averaged 2.483-2.833(150-171) Base Peak:361(322)  
BG Mode:None Segment 1 - Event 1  
Precursor Ion Scan:m/z 361.05

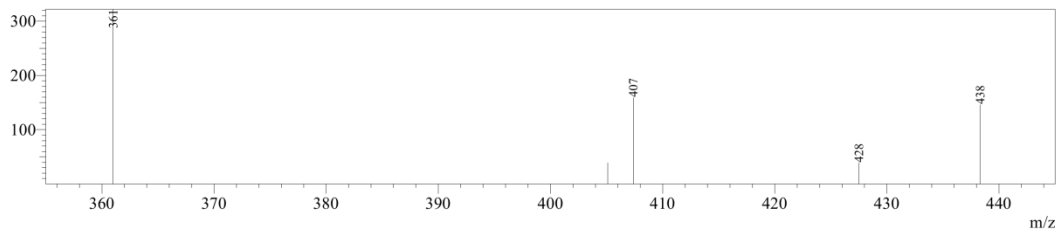

Line#:1 R.Time:----(Scan#:----)  
MassPeaks:5  
Spectrum Mode:Averaged 2.483-2.833(150-171) Base Peak:361(322)  
BG Mode:None Segment 1 - Event 1  
Precursor Ion Scan:m/z 361.05

| Sr. No. | m/z    | Absolute Intensity | Relative Intensity |
|---------|--------|--------------------|--------------------|
| 1       | 361.00 | 322                | 100.00             |
| 2       | 405.10 | 39                 | 12.11              |
| 3       | 407.40 | 159                | 49.38              |
| 4       | 427.50 | 39                 | 12.11              |
| 5       | 438.30 | 146                | 45.34              |

## Mass spectra of 4c

LC-MS Analysis Report  
DST-PURSE Central Facility  
Sardar Patel University  
Vallabh Vidyanagar

21-01-2014 10:25:06 Page 1 / 1

### <Sample Information>

Sample Name : TM 2  
Sample ID : TM 2  
Vial # : 1-17  
Injection Volume : 0.5 uL  
Date Acquired : 20-01-2014 11:17:34  
Date Processed : 20-01-2014 11:30:33

Sample Type : Unknown  
Acquired by : System Administrator  
Processed by : System Administrator

### <LC>

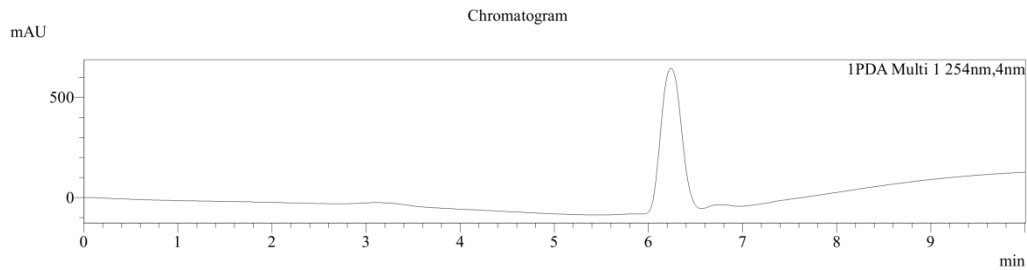

### <MS>

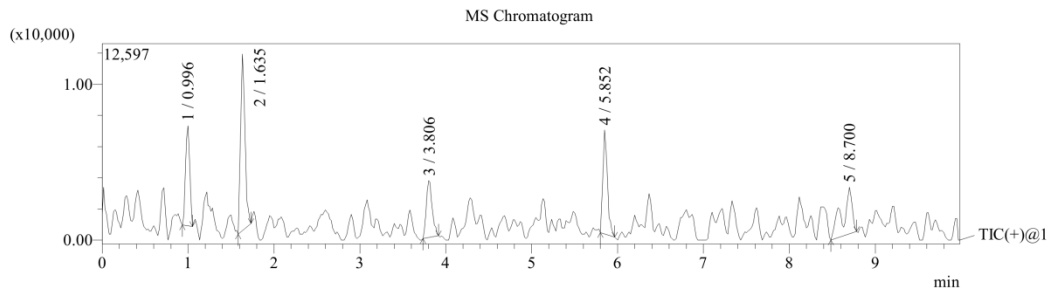

### MS Spectrum

Line#:1 R.Time:----(Scan#:-)----  
MassPeaks:9  
Spectrum Mode:Averaged 7.517-7.783(452-468) Base Peak:366(292)  
BG Mode:None Segment 1 - Event 1  
Precursor Ion Scan:m/z 365.00

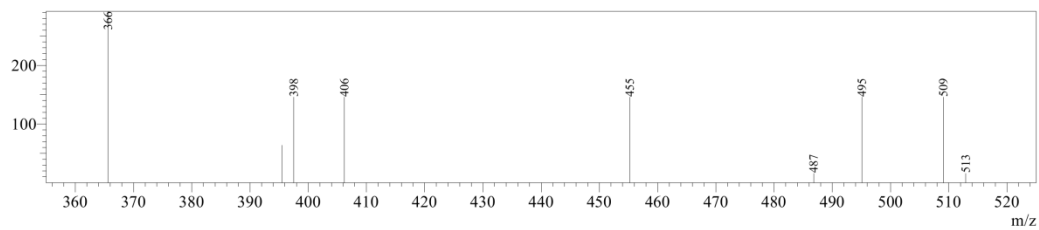

### MS Spectrum

Line#:1 R.Time:----(Scan#:-)----  
MassPeaks:9  
Spectrum Mode:Averaged 7.517-7.783(452-468) Base Peak:366(292)  
BG Mode:None Segment 1 - Event 1  
Precursor Ion Scan:m/z 365.00

| Sr. No. | m/z    | Absolute Intensity | Relative Intensity |
|---------|--------|--------------------|--------------------|
| 1       | 365.60 | 292                | 100.00             |
| 2       | 395.50 | 64                 | 21.92              |
| 3       | 397.50 | 146                | 50.00              |
| 4       | 406.20 | 146                | 50.00              |
| 5       | 455.20 | 146                | 50.00              |
| 6       | 486.80 | 16                 | 5.48               |
| 7       | 495.10 | 146                | 50.00              |
| 8       | 509.10 | 146                | 50.00              |
| 9       | 512.90 | 16                 | 5.48               |

# <sup>1</sup>H NMR of Compound 4d

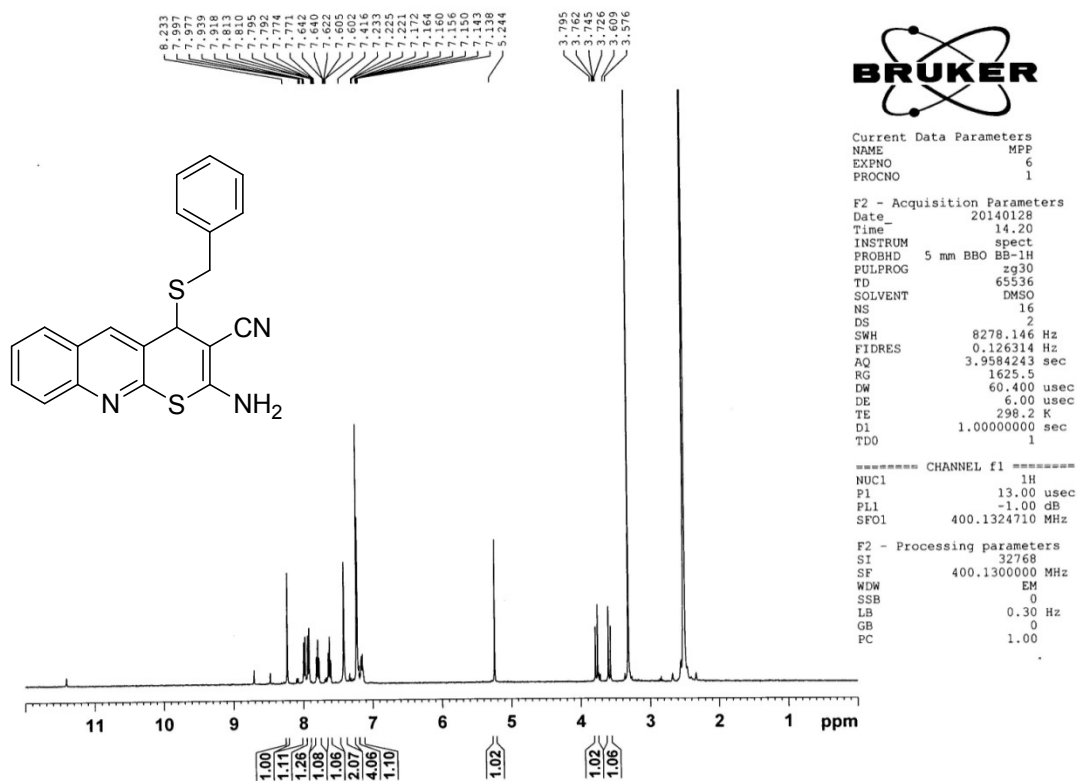

# <sup>1</sup>H NMR of Compound 4e

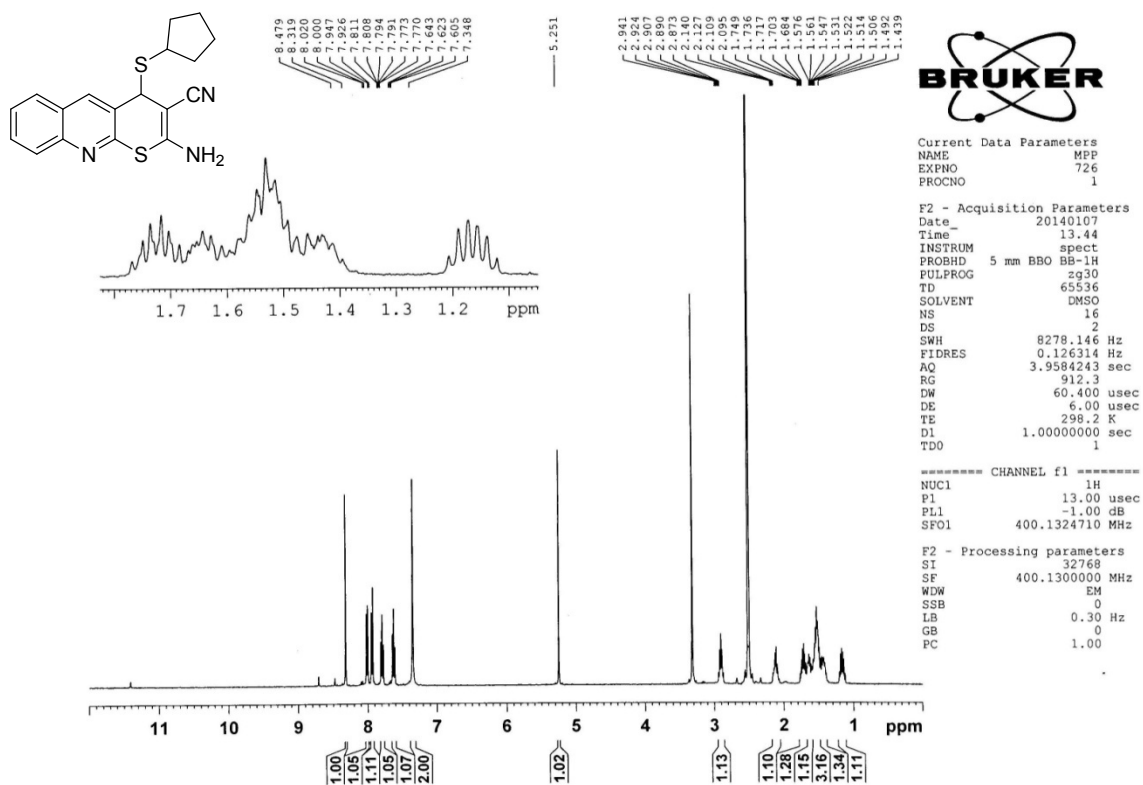



# <sup>1</sup>H NMR of Compound 4g

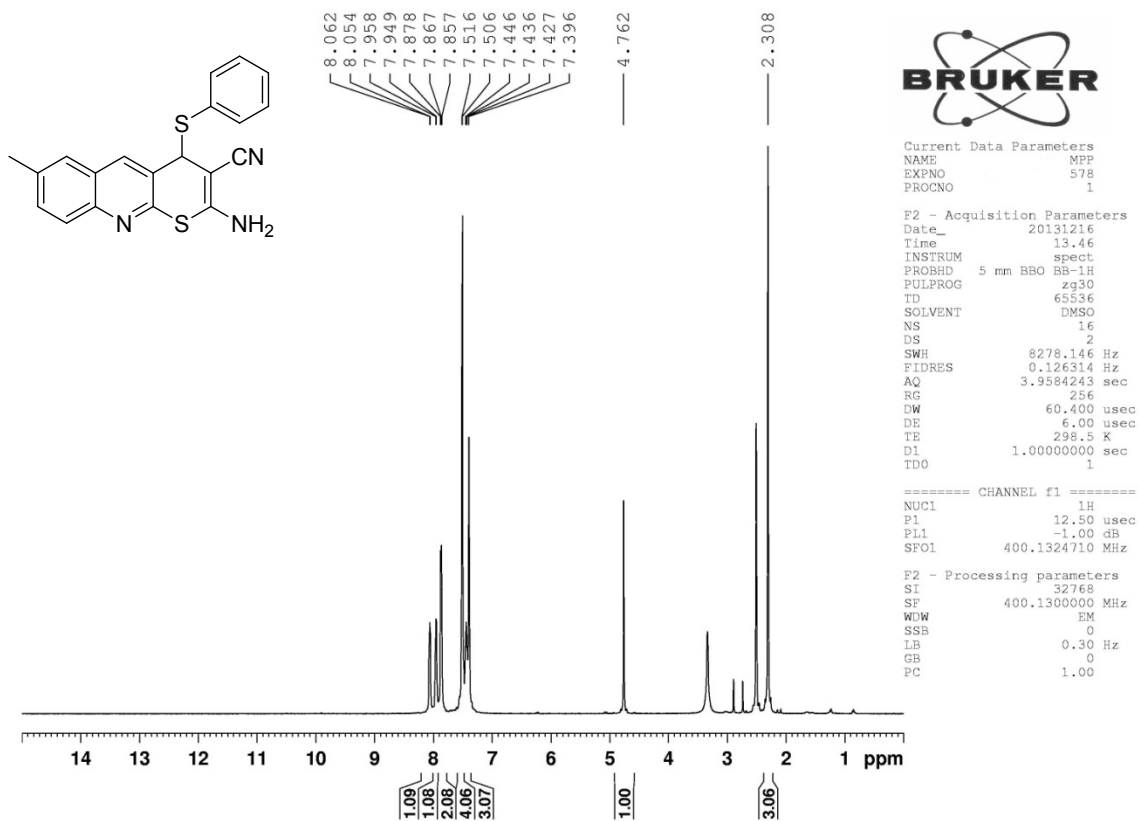

## Mass spectra of 4g

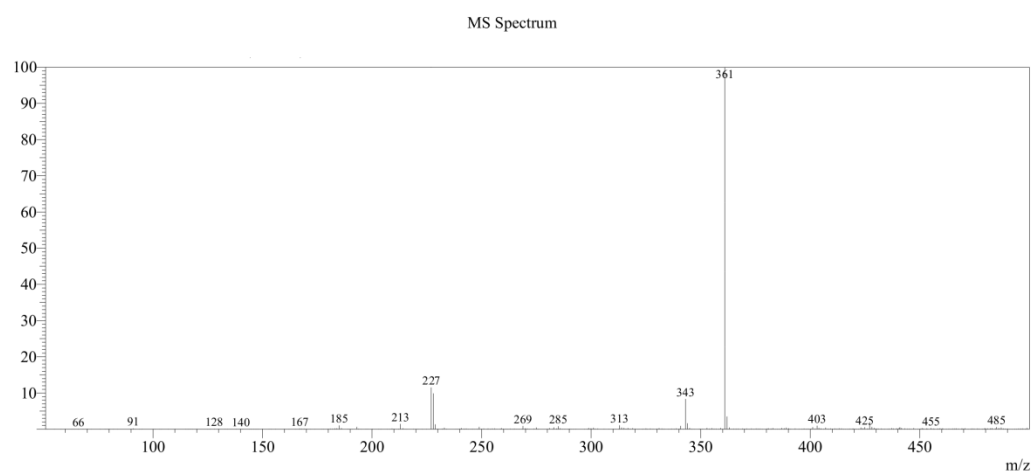

# <sup>1</sup>H NMR of Compound 4i

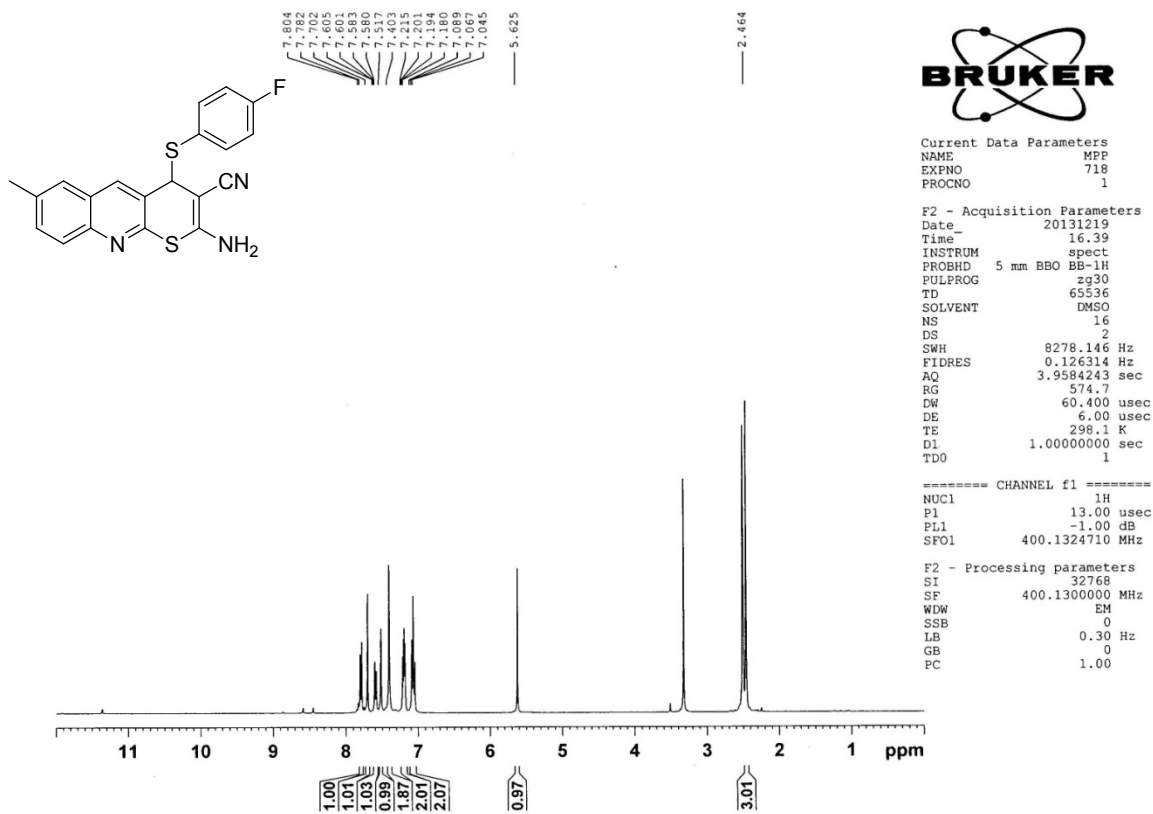

## Mass spectra of 4i

LC-MS Analysis Report  
DST-PURSE Central Facility  
Sardar Patel University  
Vallabh Vidyanagar

26-12-2013 16:25:23 Page 1 / 1

### <Sample Information>

|                  |                       |              |                        |
|------------------|-----------------------|--------------|------------------------|
| Sample Name      | : TN-10               | Sample Type  | : Unknown              |
| Sample ID        | : TN-10               |              |                        |
| Vial #           | : 1-7                 |              |                        |
| Injection Volume | : 0.1 uL              |              |                        |
| Date Acquired    | : 26-12-2013 16:05:36 | Acquired by  | : System Administrator |
| Date Processed   | : 26-12-2013 16:10:41 | Processed by | : System Administrator |

### <MS Chromatogram>

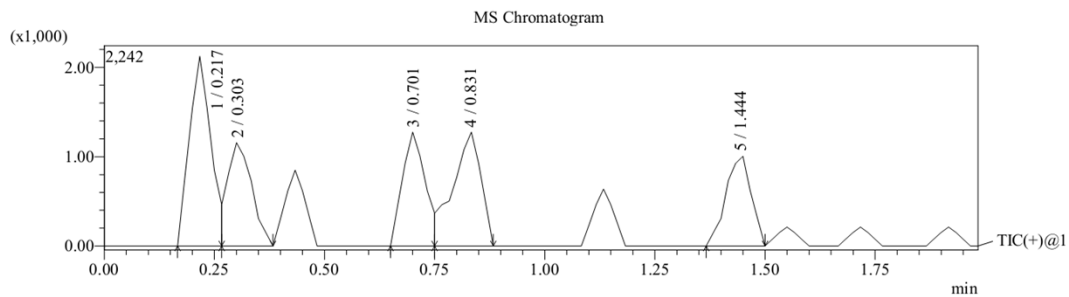

Line#:1 R.Time:----(Scan#----)  
MassPeaks:4  
Spectrum Mode:Averaged 0.250-0.667(16-41) Base Peak:379(325)  
BG Mode:None Segment 1 - Event 1  
Precursor Ion Scan:m/z 378.40

MS Spectrum

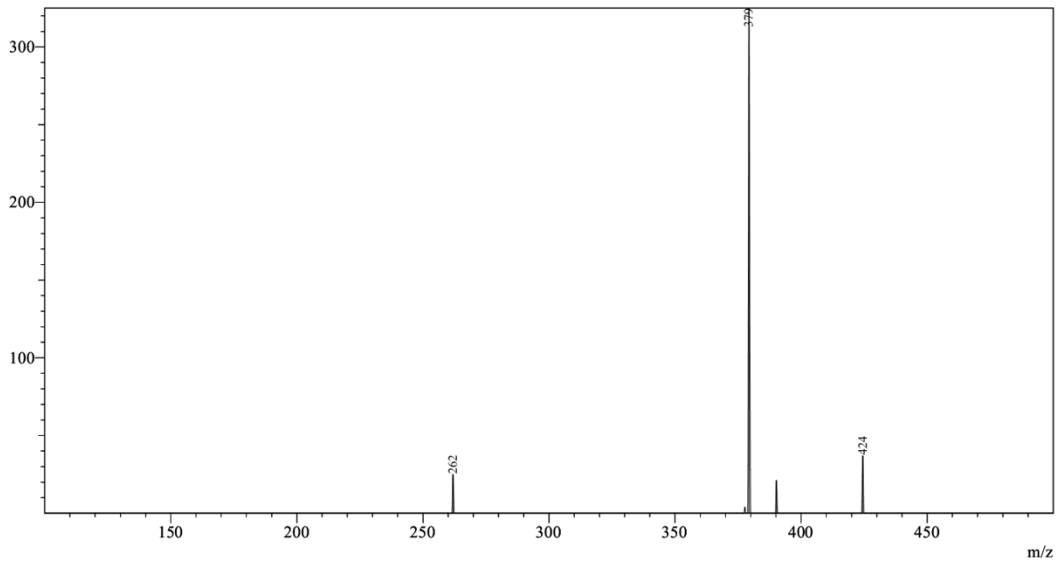

MS Spectrum

Line#:1 R.Time:----(Scan#----)  
MassPeaks:4  
Spectrum Mode:Averaged 0.250-0.667(16-41) Base Peak:379(325)  
BG Mode:None Segment 1 - Event 1  
Precursor Ion Scan:m/z 378.40

| Sr. No. | m/z    | Absolute Intensity | Relative Intensity |
|---------|--------|--------------------|--------------------|
| 1       | 261.90 | 25                 | 7.69               |
| 2       | 379.30 | 325                | 100.00             |
| 3       | 390.20 | 21                 | 6.46               |
| 4       | 424.40 | 37                 | 11.38              |

# Mass spectra of 4k

LC-MS Analysis Report  
DST-PURSE Central Facility  
Sardar Patel University  
Vallabh Vidyanagar

21-01-2014 10:30:12 Page 1 / 1

## <Sample Information>

Sample Name : TM 6a  
Sample ID : TM 6a  
Vial # : 1-20  
Injection Volume : 0.5 uL  
Date Acquired : 20-01-2014 12:05:27  
Date Processed : 20-01-2014 12:38:59

Sample Type : Unknown  
Acquired by : System Administrator  
Processed by : System Administrator

## <LC>

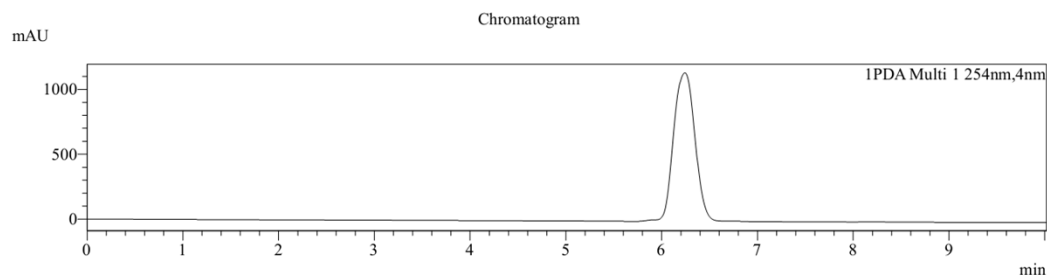

## <MS>

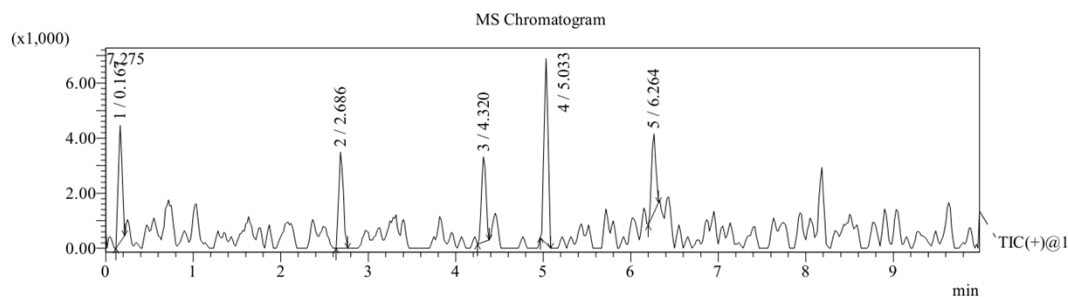

Line#:1 R.Time:---(Scan#;---)  
MassPeaks:5  
Spectrum Mode:Averaged 5.800-5.983(349-360) Base Peak:105(217)  
BG Mode:None Segment 1 - Event 1  
Precursor Ion Scan:m/z 353.10

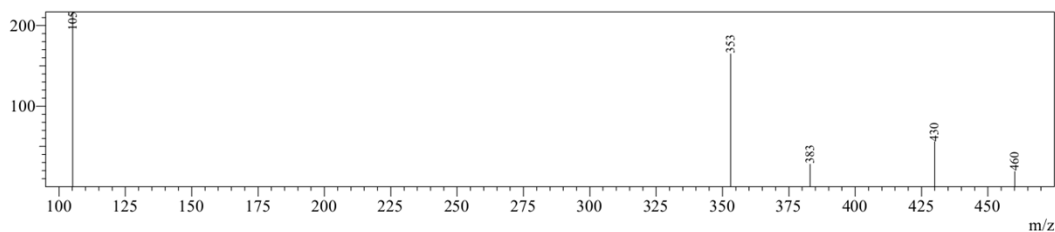

Line#:1 R.Time:---(Scan#;---)  
MassPeaks:5  
Spectrum Mode:Averaged 5.800-5.983(349-360) Base Peak:105(217)  
BG Mode:None Segment 1 - Event 1  
Precursor Ion Scan:m/z 353.10

| Sr. No. | m/z    | Absolute Intensity | Relative Intensity |
|---------|--------|--------------------|--------------------|
| 1       | 105.10 | 217                | 100.00             |
| 2       | 353.00 | 165                | 76.04              |
| 3       | 383.00 | 28                 | 12.90              |
| 4       | 430.00 | 56                 | 25.81              |
| 5       | 460.10 | 19                 | 8.76               |

# <sup>1</sup>H NMR of Compound 4l

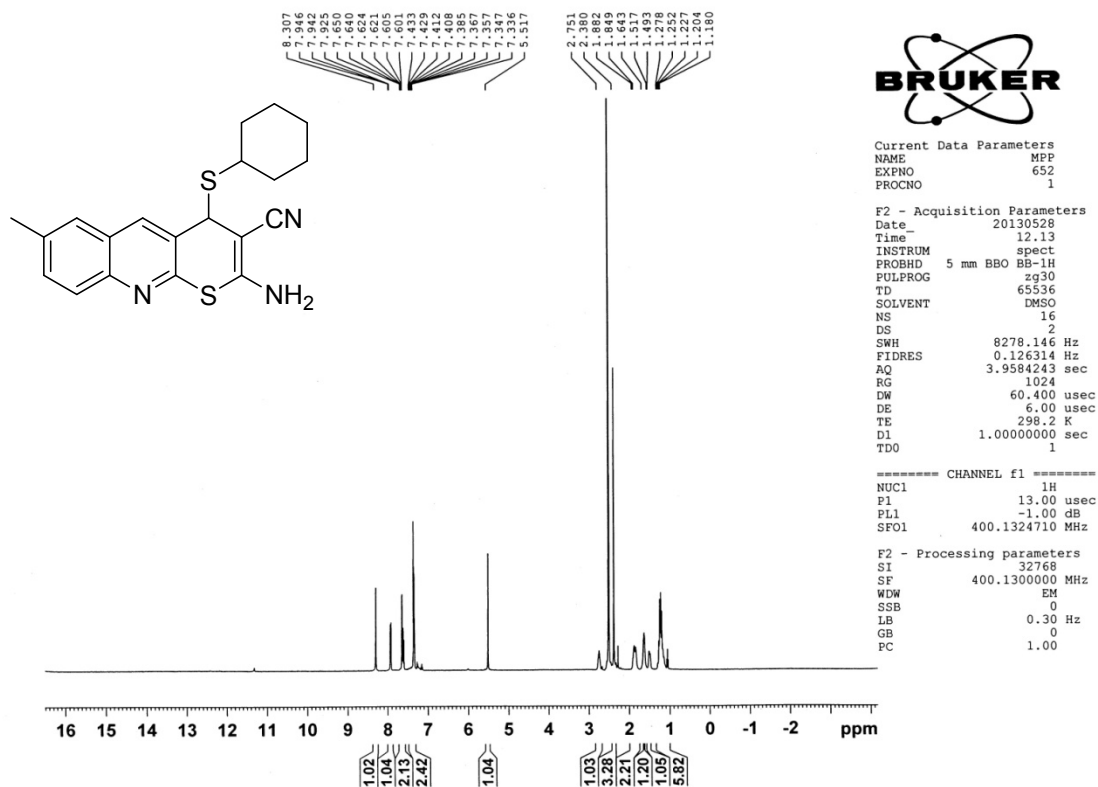

# <sup>1</sup>H NMR of Compound 4m

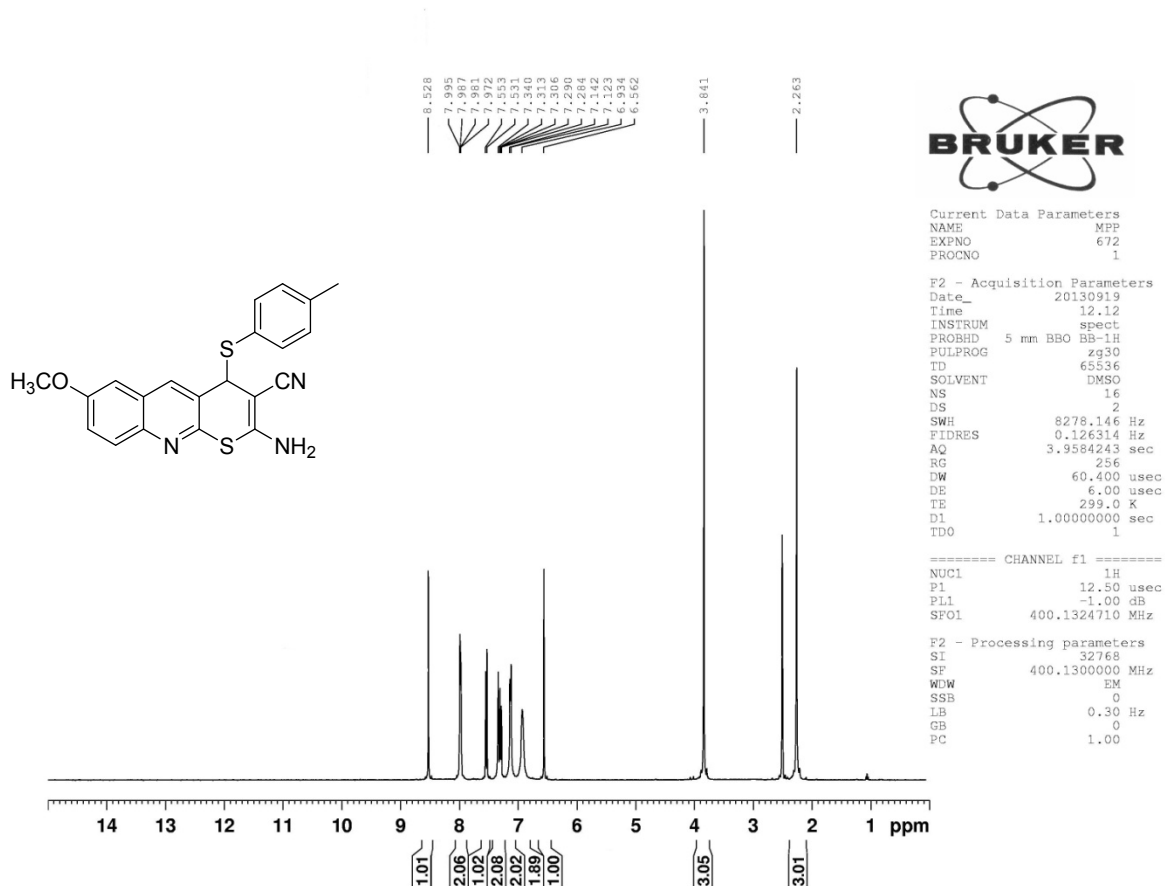

## <sup>13</sup>C NMR of Compound 4m

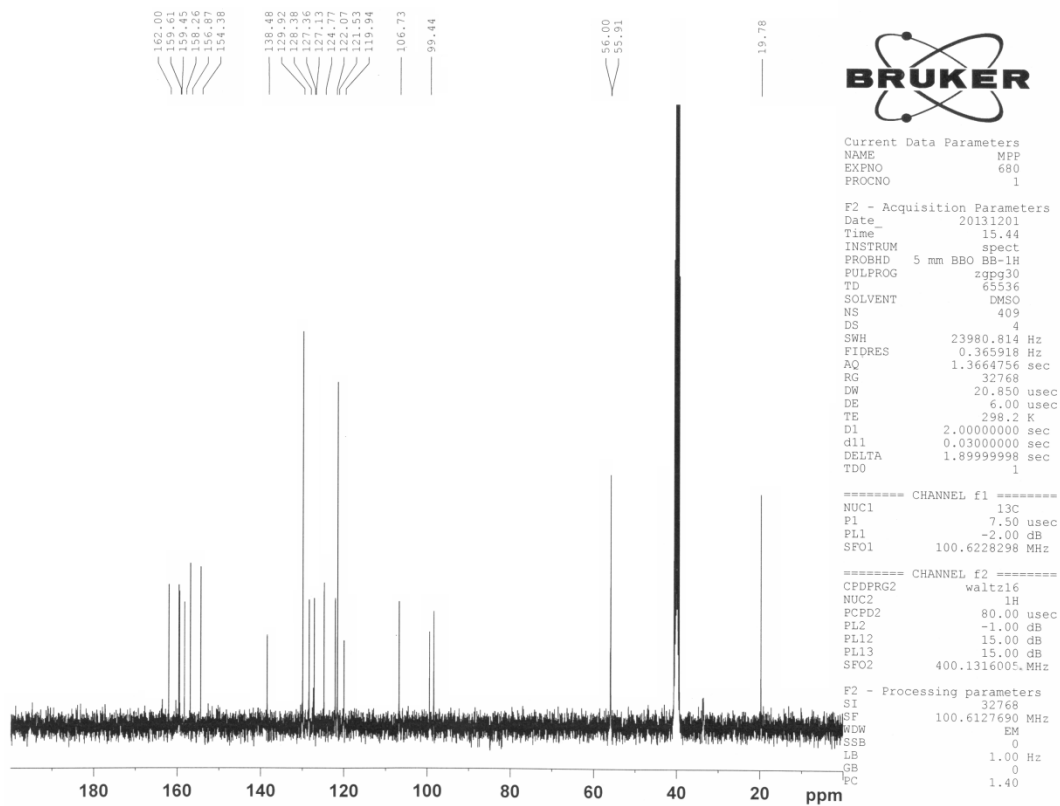





# <sup>1</sup>H NMR of Compound 4o

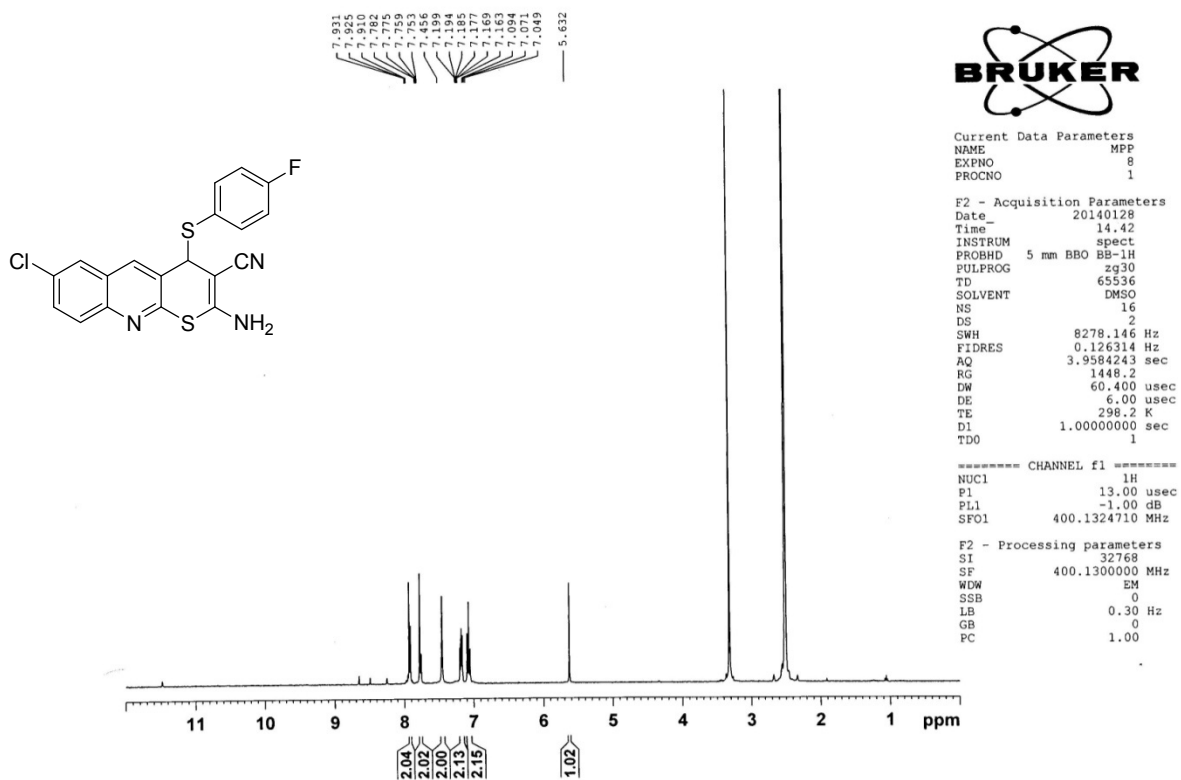

# Mass spectra of 4o

LC-MS Analysis Report  
DST-PURSE Central Facility  
Sardar Patel University  
Vallabh Vidyanagar

21-01-2014 10:19:41 Page 1 / 1

## <Sample Information>

Sample Name : TM 15  
Sample ID : TM 15  
Vial # : 1-16  
Injection Volume : 0.5 uL  
Date Acquired : 20-01-2014 11:01:28  
Date Processed : 20-01-2014 11:15:06

Sample Type : Unknown  
Acquired by : System Administrator  
Processed by : System Administrator

## <LC>

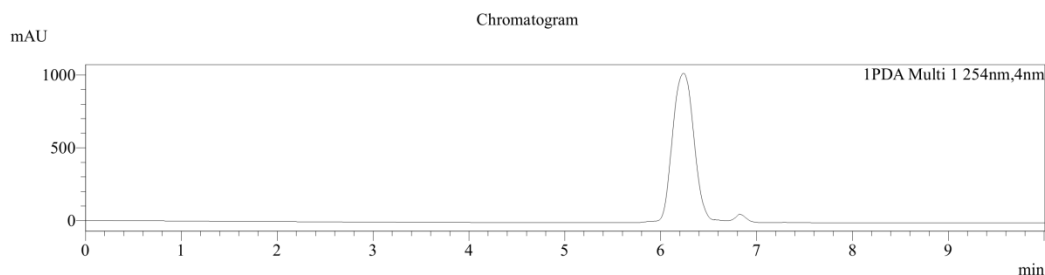

## <MS>

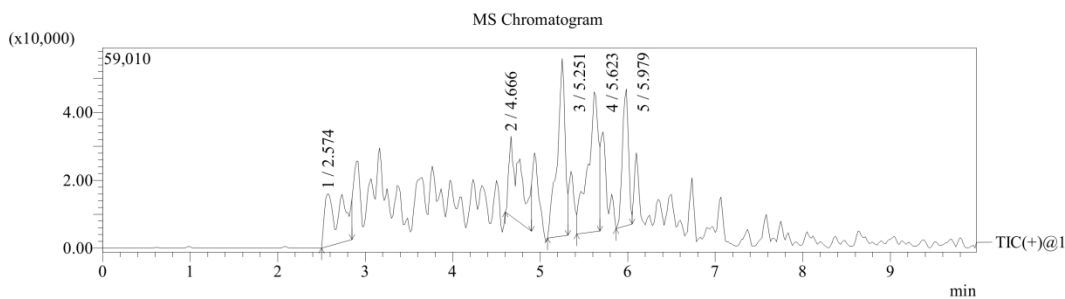

Line#:1 R.Time:----(Scan#----)

MassPeaks:8

Spectrum Mode:Averaged 8.417-8.767(506-527) Base Peak:400(933)

BG Mode:None Segment 1 - Event 1

Precursor Ion Scan:m/z 400.00

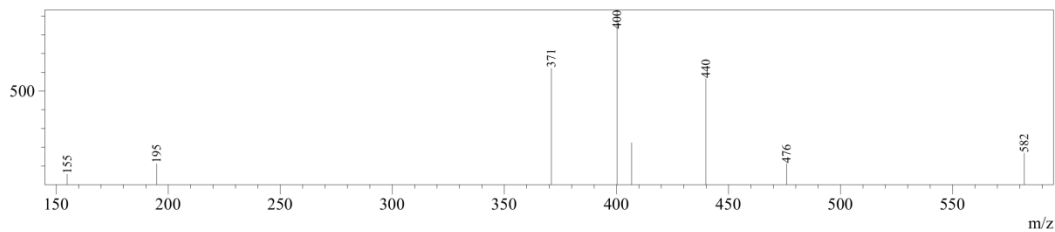

Line#:1 R.Time:----(Scan#----)

MassPeaks:8

Spectrum Mode:Averaged 8.417-8.767(506-527) Base Peak:400(969)

BG Mode:None Segment 1 - Event 1

Precursor Ion Scan:m/z 400.00

| Sr. No. | m/z    | Absolute Intensity | Relative Intensity |
|---------|--------|--------------------|--------------------|
| 1       | 154.90 | 56                 | 6.00               |
| 2       | 194.90 | 113                | 12.11              |
| 3       | 370.90 | 622                | 66.67              |
| 4       | 400.25 | 933                | 100.00             |
| 5       | 406.80 | 225                | 24.12              |
| 6       | 439.90 | 566                | 60.66              |
| 7       | 475.80 | 113                | 12.11              |
| 8       | 582.00 | 169                | 18.11              |
